# Supplementary material for: Nanoclay-functionalized 3D nanofibrous scaffolds promote bone regeneration
Source: Royal Society of Chemistry journal article supplement (doi:10.1039/c9tb02814e), 2020-01-01
Supplement: c9tb02814e1.pdf [file c9tb02814e1.pdf]

Supplementary data

**Nanoclay-Functionalized 3D Nanofibrous Scaffolds  
Promote Bone Regeneration**

Qingqing Yao <sup>a, b</sup>, Kirby E. Fuglsby <sup>b</sup>, Xiao Zheng <sup>a</sup>, Hongli Sun <sup>b, \*</sup>

<sup>a</sup> Institute of Advanced Materials for Nano-Bio Applications, School of  
Ophthalmology and Optometry/School of Biomedical Engineering, State Key  
Laboratory of Ophthalmology, Optometry and Visual Science, Wenzhou Medical  
University, Wenzhou, Zhejiang, 325027, China

<sup>b</sup> Department of Biomedical Engineering, University of South Dakota, BioSNTR,

Sioux Falls, SD 57107, USA

Corresponding Author

\* Professor Hongli Sun, Ph.D.

Current Address:

Iowa Institute for Oral Health Research  
Department of Oral and Maxillofacial Surgery

N405 DSB, College of Dentistry

801 Newton Road

The University of Iowa

Iowa City, IA 52242

Tel: 319-335-1217

E-mail: [hongli-sun@uiowa.edu](mailto:hongli-sun@uiowa.edu)

### ALP and Alizarin Red S (ARS) staining

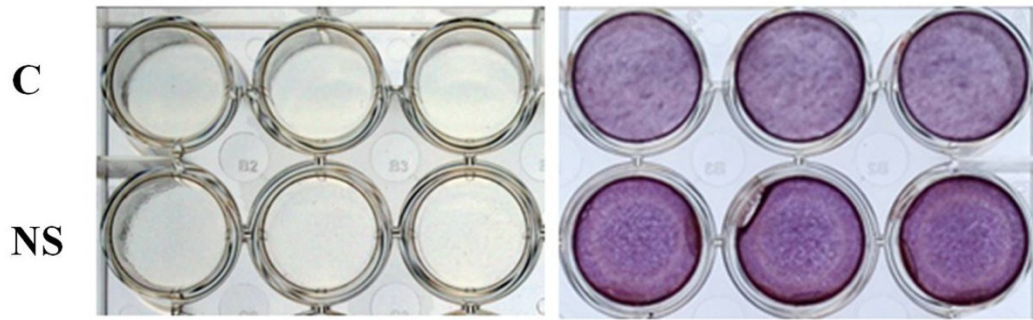

Figure S1. The effects of NS (50  $\mu\text{g/mL}$ ) on the ALP activity (on day 7, left panel) and mineralization (on day 21, right panel) of MC3T3-E1 cells (mouse pre-osteoblast cells).

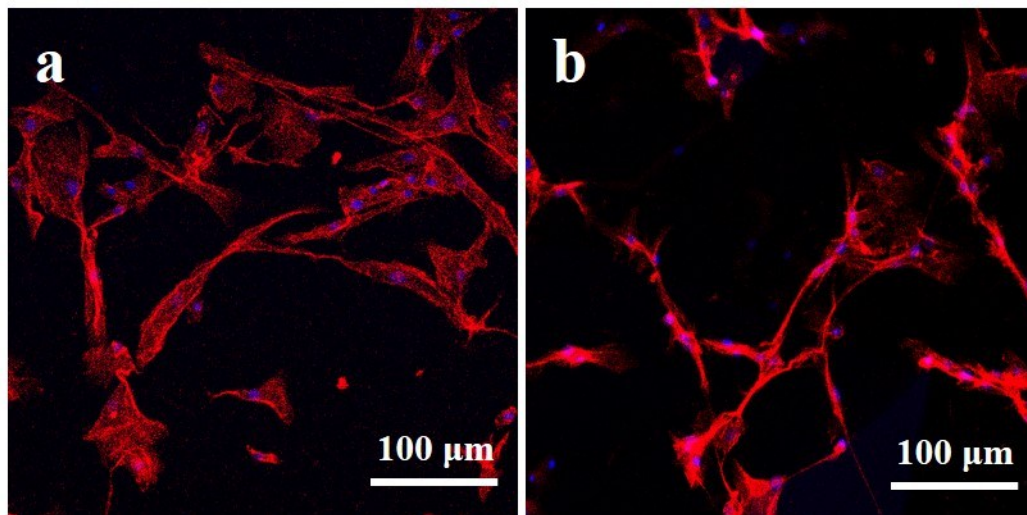

Figure S2. Confocal images of hMSCs cells on (a) GF and (b) GF/NS scaffolds.

### Wnt/ $\beta$ -Catenin signaling related gene expression

The housekeeping gene glyceraldehyde 3-phosphate dehydrogenase (GAPDH) was used for normalization and the primer sequences of AXIN2 and  $\beta$ -Catenin genes for real time PCR were summarized in Table 1. At least three replicates were performed on each sample.

Table S1. Real-time PCR primer sequences.

| Genes            | Forward primer sequences         | Reverse primer sequences    |
|------------------|----------------------------------|-----------------------------|
| GAPDH            | 5' TCAGCAATGCCTCCTGCAC 3'        | 5'TCTGGGTGGCAGTGATGC3'<br>, |
| AXIN2            | 5'CCCCAAAGCAGCGGTGC3'            | 5'GCGTGGACACCTGCCAG3'       |
| $\beta$ -Catenin | 5'GCTACTGTTGGATTGATTGAAATC<br>3' | 5'CCCTGCTCACGCAAAGT3'       |

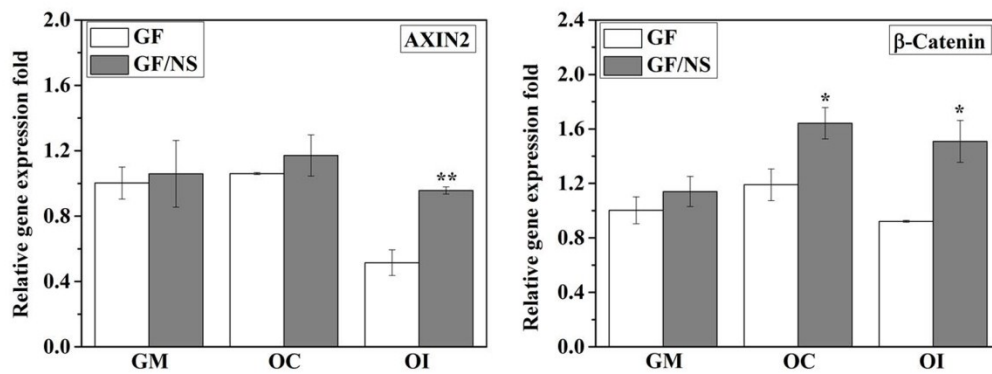

Figure S3. The relative gene expression levels of AXIN2 (left) and  $\beta$ -Catenin in hMSCs cultured on GF and GF/NS scaffolds in growth medium (GM), osteoconductive medium (OC) and osteoinductive medium (OI). Data are expressed as mean  $\pm$  SD (n = 3). \* $p$  < 0.05
